# Supplementary material for: Expression of the IL-18-related gene PTX3 correlates with clinicopathological features and prognosis in glioma patients
Source: PeerJ. 2025 Jul 10;13:e19675. doi: 10.7717/peerj.19675 (PMC12256040; doi:10.7717/peerj.19675)
Supplement: Supplemental Information 1 [file peerj-13-19675-s001.xlsx]

## Sheet: Raw Data
	IDH status	1p/19q codeletion	WHO grade	Age	IHC score
Patient1	WT	Non-codel	G4	>60	12
Patient2	WT	Non-codel	G3	≤60	12
Patient3	WT	Non-codel	G2	>60	12
Patient4	WT	Codel	G3	>60	12
Patient5	WT	Non-codel	G4	>60	12
Patient6	WT	Codel	G3	>60	12
Patient7	WT	Non-codel	G4	≤60	12
Patient8	WT	Codel	G4	>60	12
Patient9	WT	Non-codel	G4	>60	12
Patient10	Mut	Non-codel	G4	>60	12
Patient11	Mut	Non-codel	G4	>60	12
Patient12	WT	Non-codel	G4	>60	12
Patient13	WT	Non-codel	G4	>60	12
Patient14	WT	Non-codel	G3	>60	12
Patient15	WT	Non-codel	G4	>60	12
Patient16	Mut	Non-codel	G3	>60	12
Patient17	Mut	Codel	G3	>60	12
Patient18	WT	Non-codel	G3	≤60	12
Patient19	Mut	Codel	G2	>60	12
Patient20	WT	Non-codel	G4	>60	12
Patient21	WT	Codel	G3	>60	10
Patient22	WT	Non-codel	G4	>60	10
Patient23	WT	Codel	G2	≤60	10
Patient24	WT	Codel	G3	>60	10
Patient25	WT	Codel	G3	≤60	10
Patient26	WT	Codel	G2	>60	10
Patient27	WT	Non-codel	G4	≤60	10
Patient28	Mut	Non-codel	G2	>60	10
Patient29	Mut	Codel	G3	>60	10
Patient30	Mut	Non-codel	G3	>60	10
Patient31	Mut	Non-codel	G2	≤60	10
Patient32	Mut	Non-codel	G2	>60	10
Patient33	WT	Non-codel	G4	>60	10
Patient34	WT	Non-codel	G4	>60	10
Patient35	WT	Non-codel	G3	>60	10
Patient36	WT	Non-codel	G4	≤60	10
Patient37	WT	Non-codel	G4	>60	10
Patient38	Mut	Non-codel	G3	>60	10
Patient39	Mut	Codel	G2	≤60	10
Patient40	WT	Non-codel	G4	>60	10
Patient41	WT	Non-codel	G4	≤60	10
Patient42	Mut	Codel	G2	≤60	10
Patient43	Mut	Codel	G2	>60	10
Patient44	WT	Non-codel	G4	>60	10
Patient45	Mut	Non-codel	G3	>60	10
Patient46	WT	Codel	G4	>60	8
Patient47	WT	Non-codel	G3	>60	8
Patient48	WT	Non-codel	G2	>60	8
Patient49	WT	Codel	G4	>60	8
Patient50	WT	Non-codel	G3	>60	8
Patient51	WT	Non-codel	G4	>60	8
Patient52	WT	Non-codel	G3	≤60	8
Patient53	WT	Codel	G3	≤60	8
Patient54	Mut	Codel	G2	>60	8
Patient55	Mut	Non-codel	G2	≤60	8
Patient56	Mut	Codel	G3	>60	8
Patient57	Mut	Non-codel	G2	>60	8
Patient58	Mut	Non-codel	G3	>60	8
Patient59	Mut	Non-codel	G4	>60	8
Patient60	Mut	Non-codel	G3	≤60	8
Patient61	Mut	Codel	G2	>60	8
Patient62	Mut	Codel	G2	>60	8
Patient63	Mut	Codel	G2	>60	8
Patient64	Mut	Non-codel	G4	>60	8
Patient65	WT	Non-codel	G3	>60	8
Patient66	WT	Non-codel	G4	>60	8
Patient67	Mut	Non-codel	G2	>60	8
Patient68	Mut	Codel	G2	>60	8
Patient69	WT	Non-codel	G4	>60	8
Patient70	Mut	Codel	G3	≤60	8
Patient71	WT	Non-codel	G4	≤60	8
Patient72	WT	Non-codel	G4	>60	8
Patient73	WT	Non-codel	G4	≤60	8
Patient74	WT	Non-codel	G3	≤60	6
Patient75	WT	Codel	G2	≤60	6
Patient76	WT	Codel	G2	>60	6
Patient77	Mut	Codel	G2	>60	6
Patient78	Mut	Non-codel	G3	≤60	6
Patient79	Mut	Codel	G3	>60	6
Patient80	Mut	Codel	G2	≤60	6
Patient81	WT	Non-codel	G4	≤60	6
Patient82	Mut	Codel	G2	>60	6
Patient83	Mut	Codel	G2	>60	6
Patient84	WT	Non-codel	G4	≤60	6
Patient85	Mut	Non-codel	G2	≤60	6
Patient86	WT	Non-codel	G4	>60	6
Patient87	Mut	Non-codel	G3	>60	6
Patient88	Mut	Codel	G3	>60	6
Patient89	WT	Non-codel	G4	>60	6
Patient90	Mut	Codel	G2	>60	6
Patient91	WT	Codel	G2	≤60	4
Patient92	WT	Non-codel	G2	≤60	4
Patient93	WT	Non-codel	G2	>60	4
Patient94	Mut	Codel	G3	≤60	4
Patient95	Mut	Codel	G2	>60	4
Patient96	Mut	Codel	G2	≤60	4
Patient97	Mut	Codel	G3	>60	4
Patient98	Mut	Codel	G2	≤60	4
Patient99	Mut	Codel	G2	≤60	4
Patient100	Mut	Non-codel	G3	>60	4
Patient101	Mut	Codel	G2	≤60	4
Patient102	Mut	Codel	G2	>60	4
Patient103	Mut	Non-codel	G3	>60	4
Patient104	WT	Non-codel	G4	≤60	4
Patient105	Mut	Codel	G2	>60	4
Patient106	Mut	Non-codel	G3	>60	4
Patient107	Mut	Non-codel	G4	>60	4
Patient108	Mut	Codel	G2	>60	4
