# Supplementary material for: Expression of the IL-18-related gene PTX3 correlates with clinicopathological features and prognosis in glioma patients
Source: PeerJ. 2025 Jul 10;13:e19675. doi: 10.7717/peerj.19675 (PMC12256040; doi:10.7717/peerj.19675)
Supplement: Supplemental Information 2 [file peerj-13-19675-s002.xlsx]

## Sheet: Sheet1
Gene
AARS1
ACACB
ACADS
ACOD1
ACTA1
ACTA2
ADAMTS5
ADIPOQ
ALS2
ANP32A
ARF6
ARFGAP1
ARFGAP2
ARG1
ARL4D
ATF3
BAD
BAX
BAZ1B
BCL2
BCL2L1
BID
BIN1
BIRC3
BMP2
BPGM
BSG
BTG2
CA11
CASP3
CASP8
CCDC9
CCL1
CCL19
CCL2
CCL20
CCN4
CCNA2
CCNB2
CD36
CD81
CD83
CDK5R2
CEBPB
CENPB
CETP
CFLAR
CHUK
CLDN1
CLDN12
CLDN15
CLDN3
CLDN4
CNTN2
COL1A1
COL1A2
COL3A1
COX17
CPT1A
CTNNB1
CXCL16
CXCL2
CXCL3
CXCL8
CYCS
DEK
DES
EEF2
ELAVL1
ENO1
EPB41
EPS8
FADD
FAM110A
FAM186B
FAS
FASLG
FBXW7
FN1
FOS
FOXN3
FUT1
GATA1
GPAT4
GRIN2B
GRM7
GRN
GSK3B
HADH
HCAR2
HDAC3
HDGF
HMOX1
HOXD8
HPS1
HSPB1
HSPB8
ICAM1
IFNG
IKBKB
IL10
IL12B
IL13
IL17RC
IL18
IL18BP
IL18R1
IL18RAP
IL1B
IL2RA
IL37
IL6
IL9
IMP3
IRAK1
IRF1
IRF6
ITGA2B
ITM2C
JUN
KCNH2
KIFC3
KITLG
KLC1
KLF2
LARS2
LCK
LMNB2
LONP2
LRRFIP1
MAP2K7
MAP3K7
MAPK1
MAPK3
MAPK9
MBTPS1
MEF2A
MEPCE
MIR3606
MIR3917
MIR6732
MIR7108
MIR7114
MIR718
MMP14
MMP2
MMP3
MMP8
MMP9
MTCH1
MYD88
MYH6
MYH7
NACA
NCAPH2
NCF1
NCF2
NDUFC1
NFKB1
NFKB2
NFKBIA
NFKBIE
NFKBIZ
NOS2
NOX1
NPPA
NPPB
NR0B2
NR1H3
NR4A1
NRN1
NSMF
PARP1
PHF20
PIGT
PIK3R1
PKN1
PLA2G7
PLCG1
PLD1
PLOD3
PPP1R13L
PRCC
PRKAA1
PRKCA
PRKCB
PRKCD
PRM1
PTGS2
PTMS
PTPN7
PTPRZ1
PTX3
PWWP3A
PYGB
RAE1
RANGAP1
REL
RELA
RFX5
RGS16
RND2
RPS11
RPS6KB1
RPTOR
RUNX2
RUSC1
S1PR4
SDC4
SEMA6C
SEMA6D
SLC12A3
SLC4A7
SNTB1
SOCS3
SP1
SPON1
SPP1
STK40
STMN1
STOML1
SYT10
TACR1
TBX21
TF
TGM2
TICAM2
TIMP1
TIMP3
TMEM165
TMSB4X
TNFAIP2
TNFAIP3
TNFRSF11B
TNFRSF1A
TNFSF11
TNIP3
TOMM40
TP53
TRAF1
TRAF6
TRPC2
TRPC4AP
TRPM7
TSHZ1
UCK1
UGGT1
ULBP2
USP5
VEGFA
ZBTB7A
ZC3H12A
ZDHHC7
ZNF143
ZNF219
ZNF444
